# Supplementary material
Source: publisher site journal article supplement (https://www.spandidos-publications.com/2658/downloadSupplementary)

Figure S1. CRMP4-siRNA and -shRNA mediated CRMP4 protein reduction in RKO and SW620 cells. (A) RKO and SW620 cells were transfected with CRMP4-siRNA #1 and #2 at different concentrations. In this study, CRMP4-siRNA#2 was used for RKO cells (50 nM) and SW620 cells (200 nM). (B) RKO and SW620 cells were infected with lentiviral CRMP4-shRNA, and RKO#1 and SW620#4 clones were selected for further study. CRMP4, collapsin response mediator protein 4.

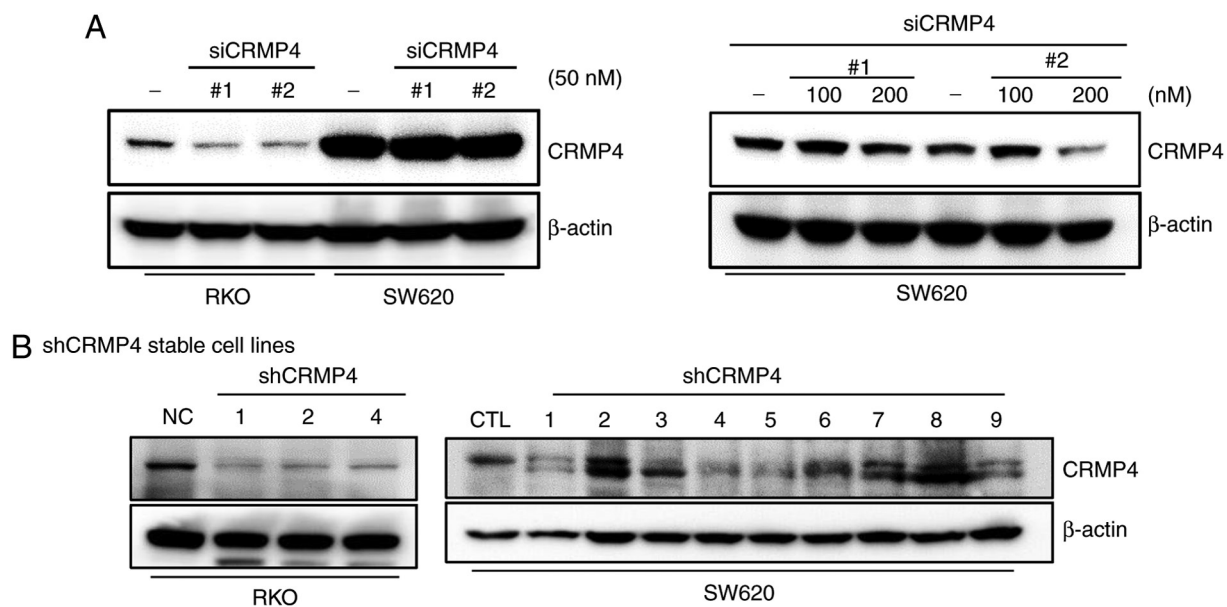

Supplement: Supplementary file 1 [file downloadSupplementary]
